# Supplementary material for: Metal–organic framework immobilized RhNi alloy nanoparticles for complete H2 evolution from hydrazine borane and hydrous hydrazine
Source: Royal Society of Chemistry journal article supplement (doi:10.1039/c7qi00555e), 2017-11-27
Supplement: c7qi00555e1.pdf [file c7qi00555e1.pdf]

## Supplementary Material

### **Metal-organic Frameworks Immobilized RhNi Alloy Nanoparticles for Complete H<sub>2</sub> Evolution from Hydrazine Borane and Hydrous Hydrazine**

Zhujun Zhang,<sup>a</sup> Shiliang Zhang,<sup>a</sup> Qilu Yao,<sup>a</sup> Gang Feng,<sup>b</sup> Meihua Zhu,<sup>a</sup> Zhang-Hui Lu<sup>\*a</sup>

<sup>a</sup>Institute of Advanced Materials, College of Chemistry and Chemical Engineering,  
Jiangxi Normal University, Nanchang 330022, China.

<sup>b</sup>College of Chemistry, Nanchang University, Nanchang 330031, China.

\*E-mail: luzh@jxnu.edu.cn

### Calculation method for TOF

The total turn-over frequency (TOF) reported in this work is an apparent TOF value based on the number of metal (Rh + Ni) atoms in catalysts, which is calculated from the equation as follows:

$$TOF = \frac{n_{H_2}}{n_{(Rh+Ni)} \times t} \quad (\text{Eq. S1})$$

Where  $n_{H_2}$  is the mole number of generated  $H_2$ ,  $n_{(Rh+Ni)}$  is the total mole number of Ni and Rh in catalyst and  $t$  is the completed reaction time in hour. The TOF values of all the cited catalysts shown in Table 1 and Table S2 are the total TOF values and are normalized to the mass of metals.

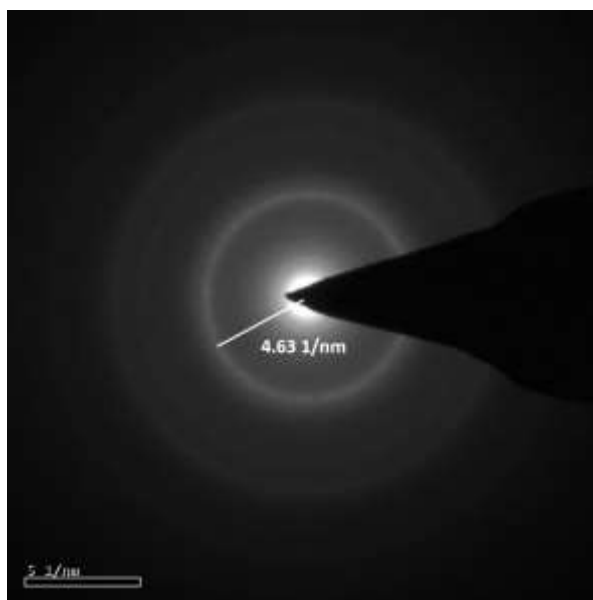

**Fig. S1** SAED image of Rh<sub>0.8</sub>Ni<sub>0.2</sub>/MIL-101 catalyst.

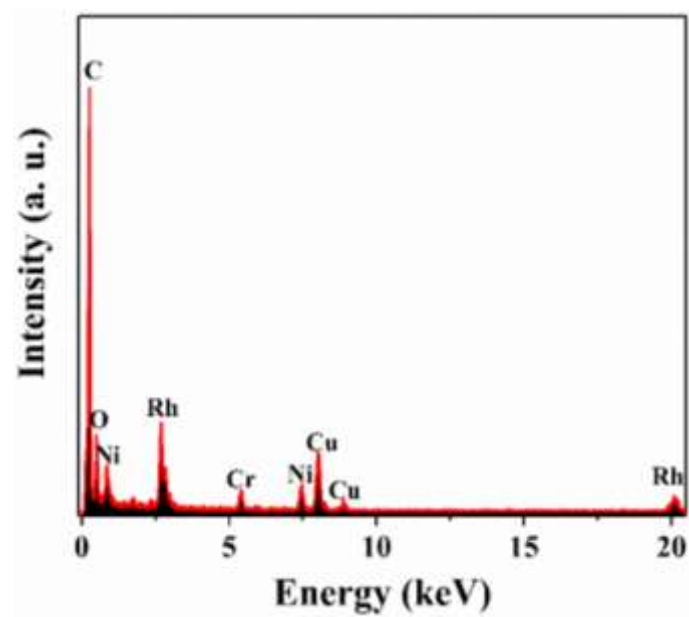

**Fig. S2** EDX spectrum of Rh<sub>0.8</sub>Ni<sub>0.2</sub>/MIL-101 catalyst.

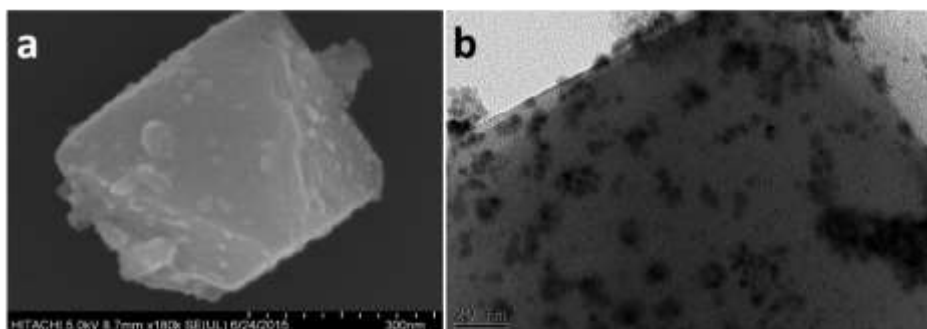

**Fig. S3** The typical SEM (a) and TEM (b) images of the  $\text{Rh}_{0.8}\text{Ni}_{0.2}/\text{MIL-101}$  catalyst obtained via a slow reduction process with a low molar ratio of reductant ( $\text{NaBH}_4/(\text{Rh}^{3+}+\text{Ni}^{2+}) = 4$ ).

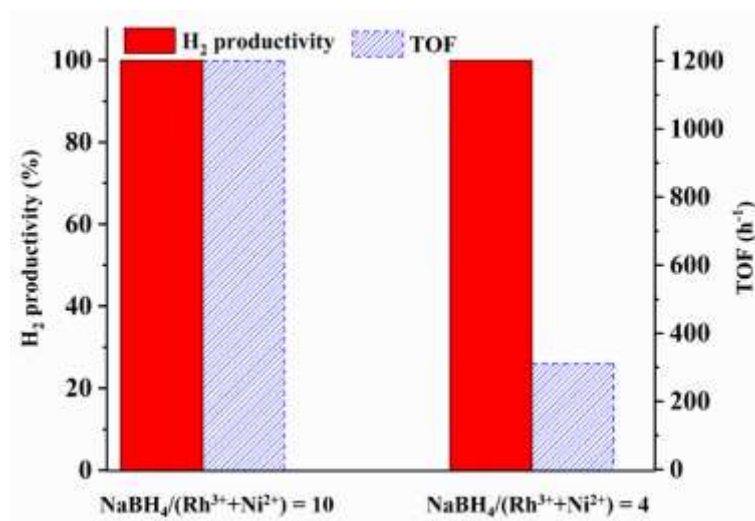

**Fig. S4** Catalytic performance of Rh<sub>0.8</sub>Ni<sub>0.2</sub>/MIL-101 catalysts obtained with different molar ratio of reductant (NaBH<sub>4</sub>/(Rh<sup>3+</sup>+Ni<sup>2+</sup>)).

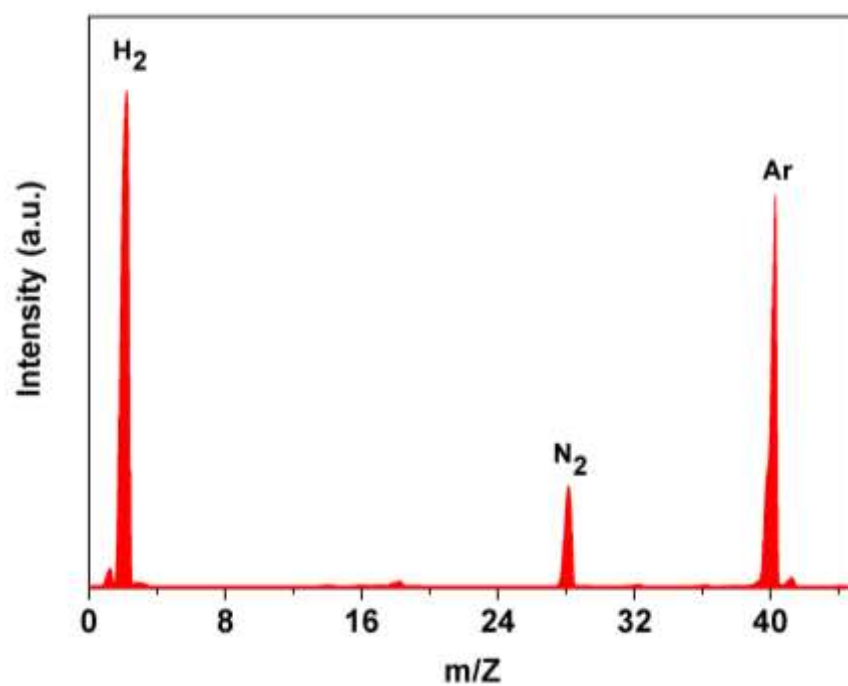

**Fig. S5** Mass spectral profile for gases released from the aqueous  $\text{N}_2\text{H}_4\text{BH}_3$  solution using  $\text{Rh}_{0.8}\text{Ni}_{0.2}/\text{MIL-101}$  catalyst under an argon atmosphere.

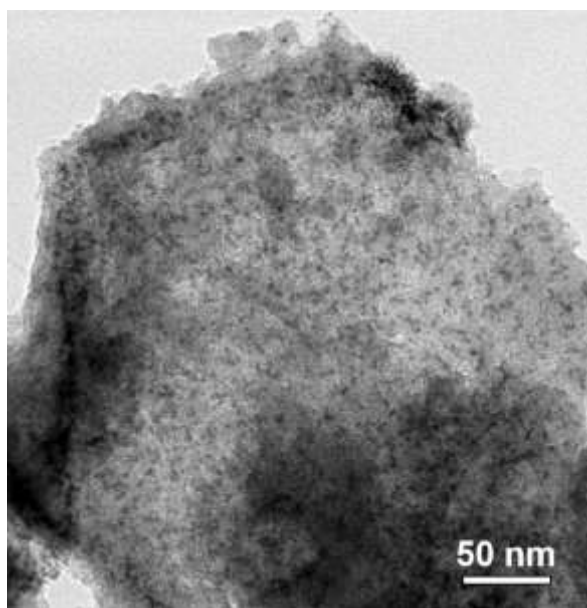

**Fig. S6** TEM image of the  $\text{Rh}_{0.8}\text{Ni}_{0.2}/\text{MIL-101}$  catalyst after the durability test.



**Table S1.** Catalysts composition determined by inductively coupled plasma atomic emission spectroscopic (ICP-AES).

| <b>Catalysts</b>                             | <b>Ni (wt%)</b> | <b>Rh (wt%)</b> | <b>Rh:Ni (atomic ratio)</b> |
|----------------------------------------------|-----------------|-----------------|-----------------------------|
| Ni/MIL-101                                   | 10.0            | ~               | ~                           |
| Rh/MIL-101                                   | ~               | 16.7            | ~                           |
| Rh <sub>0.8</sub> Ni <sub>0.2</sub> /MIL-101 | 1.9             | 13.5            | 80.2:19.8                   |

**Table S2** Activities in terms of selectivity, activation energy and *TOF* values of different catalysts tested in H<sub>2</sub> generation from hydrous hydrazine.

| Catalyst                                                                                 | T (°C)    | Selectivity (%) | $E_a$ (kJ/mol) | <i>TOF</i> (h <sup>-1</sup> ) <sup>a</sup> | Ref.              |
|------------------------------------------------------------------------------------------|-----------|-----------------|----------------|--------------------------------------------|-------------------|
| Rh                                                                                       | 25        | 44              | -              | 2.9                                        | 38                |
| Rh <sub>4</sub> Ni                                                                       | 25        | 100             | -              | 6.0                                        | 39                |
| Rh/Ni@SiO <sub>2</sub>                                                                   | 25        | 99.4            | -              | 66                                         | 40                |
| RhNi@graphene                                                                            | 25        | 100             | -              | 20.1                                       | 41                |
| Ni <sub>0.90</sub> Pt <sub>0.05</sub> Rh <sub>0.05</sub> /La <sub>2</sub> O <sub>3</sub> | 25        | 100             | -              | 45.9                                       | 42                |
| Rh-Cu NOHFs/C                                                                            | 25        | 31.4            | -              | 33.7                                       | 43                |
| Rh <sub>51</sub> Ni <sub>19</sub> P <sub>30</sub> /rGO                                   | 25        | 100             | 58.8           | 101                                        | 49                |
| RhNiB                                                                                    | 30        | 100             | -              | 54.5                                       | 44                |
| Rh <sub>0.8</sub> Ni <sub>0.2</sub> @CeO <sub>x</sub> /rGO                               | 30        | 100             | 58.0           | 36.4                                       | 21                |
| Ni <sub>3</sub> Rh <sub>7</sub> /NPC-900                                                 | 50        | 100             | -              | 156                                        | 46                |
| Ni <sub>66</sub> Rh <sub>34</sub> @ZIF-8                                                 | 50        | 100             | 58.1           | 140                                        | 47                |
| Rh <sub>58</sub> Ni <sub>42</sub> @MIL-101                                               | 50        | 100             | 33.0           | 344                                        | 50                |
| Rh <sub>55</sub> Ni <sub>45</sub> /Ce(OH)CO <sub>3</sub>                                 | 50        | 100             | 38.8           | 395                                        | 45                |
| <b>Rh<sub>0.8</sub>Ni<sub>0.2</sub>/MIL-101</b>                                          | <b>50</b> | <b>100</b>      | <b>48.4</b>    | <b>428.6</b>                               | <b>This study</b> |
| Rh <sub>92.6</sub> P <sub>7.4</sub> /rGO                                                 | 50        | 100             | 50.5           | 843.9                                      | 48                |

<sup>a</sup>The total *TOF* values were calculated according to the original data provided by the reports.
